# Supplementary material for: Inflammatory responses to secondary organic aerosols (SOA) generated from biogenic and anthropogenic precursors
Source: Copernicus journal article supplement (doi:10.5194/acp-2017-262), 2017-03-28
Supplement: Supplementary file 1 [file acp-2017-262-supplement.pdf]

**Supplement for:**

**Inflammatory responses to secondary organic aerosols (SOA) generated from biogenic and anthropogenic precursors**

*Wing Y. Tuet<sup>1</sup>, Yunle Chen<sup>2</sup>, Shierly Fok<sup>1</sup>, Julie A. Champion<sup>1</sup>, Nga L. Ng<sup>1,3\*</sup>*

<sup>1</sup>School of Chemical and Biomolecular Engineering, Georgia Institute of Technology, Atlanta, GA

<sup>2</sup>School of Materials Science and Engineering, Georgia Institute of Technology, Atlanta, GA

<sup>3</sup>School of Earth and Atmospheric Sciences, Georgia Institute of Technology, Atlanta, GA

**Corresponding Author**

\*email: [ng@chbe.gatech.edu](mailto:ng@chbe.gatech.edu)

Keywords: reactive oxygen/nitrogen species, inflammatory cytokines, particulate matter, secondary organic aerosol

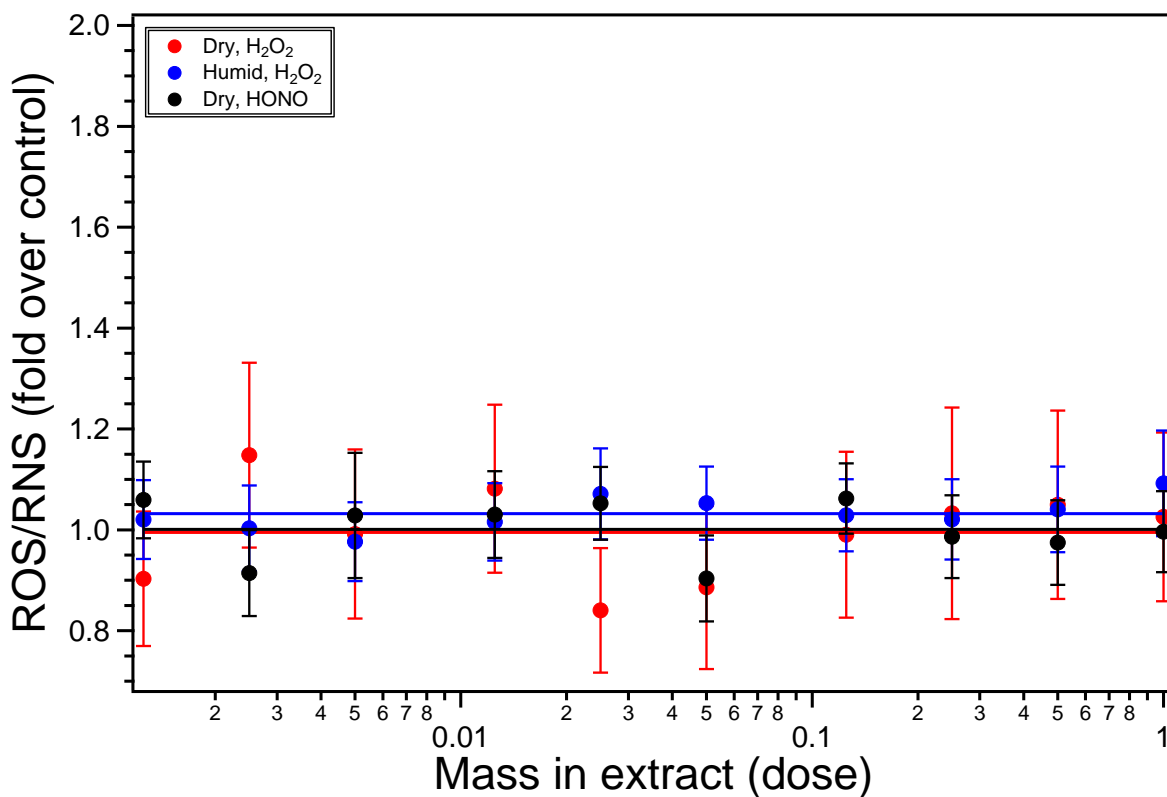

**Figure S1.** ROS/RNS produced as a result of exposure to background filters (OH precursor and seed only). ROS/RNS is expressed as a fold increase over probe-treated control cells incubated with stimulant-free media. Data shown are means  $\pm$  standard error of triplicate exposure experiments.

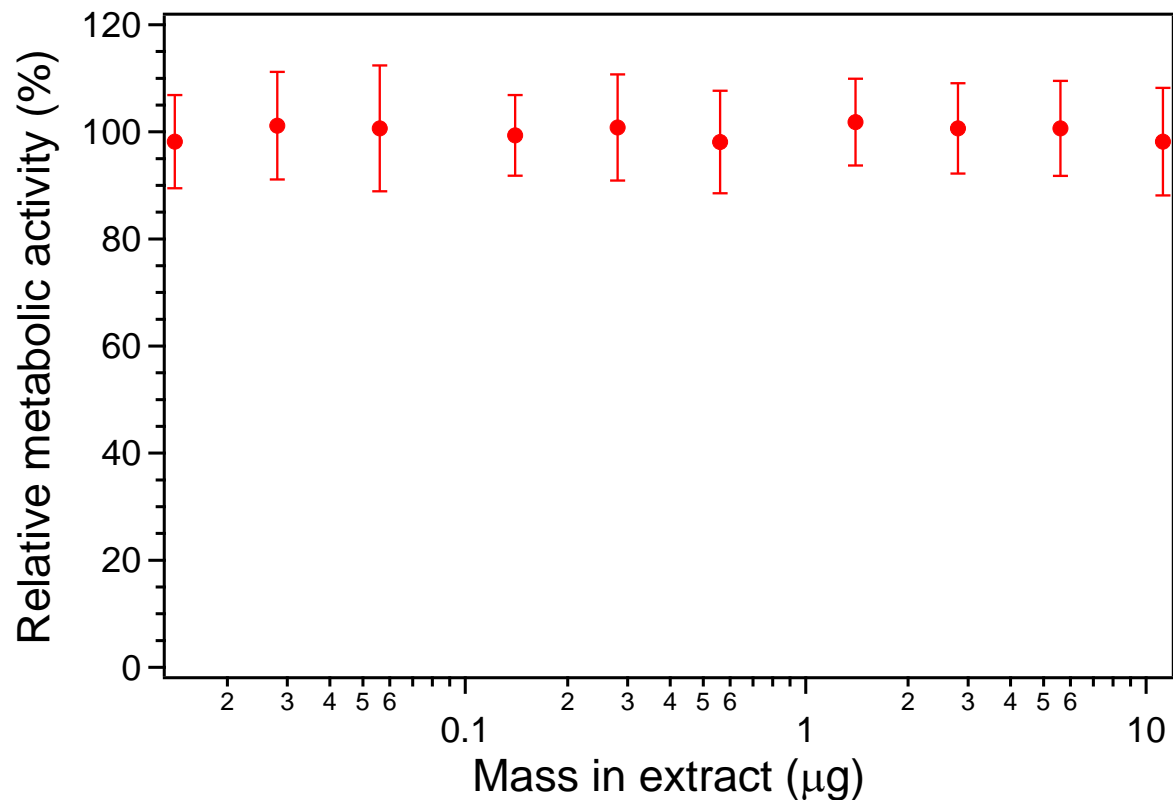

**Figure S2.** Post filter exposure cellular metabolic activity as measured by the MTT assay (filter: naphthalene SOA formed under dry, RO<sub>2</sub> + NO dominant conditions). Cellular metabolic activity is normalized to cells exposed to stimulant-free media. Data shown are means  $\pm$  standard error of triplicate exposure experiments. All filter exposures produced similar results.

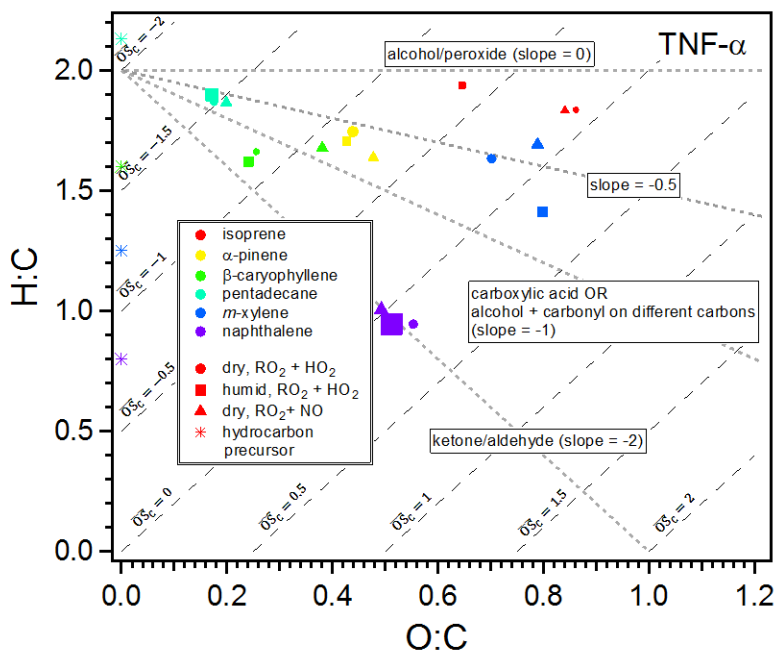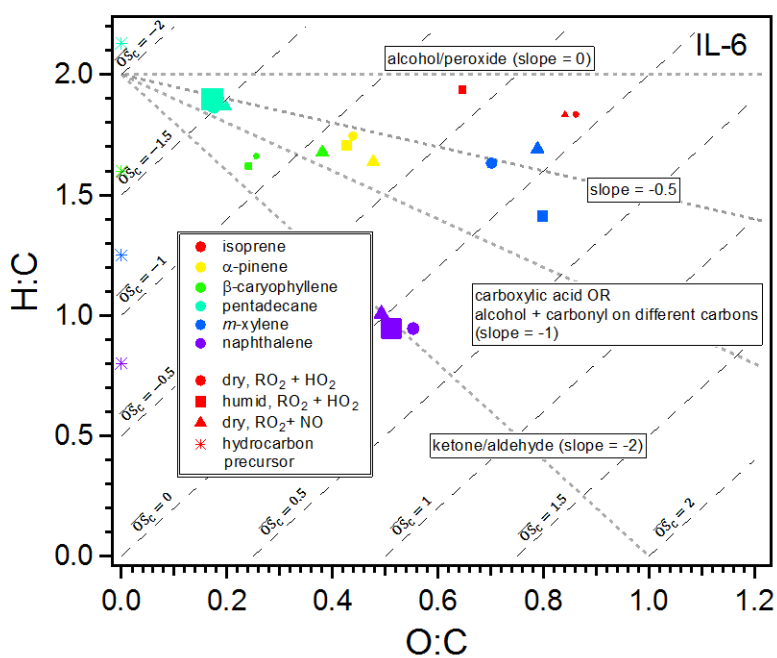

**Figure S3.** van Krevelen plot for various SOA systems. Data points are colored by SOA system (red: isoprene, yellow:  $\alpha$ -pinene, green:  $\beta$ -caryophyllene, light blue: pentadecane, blue: *m*-xylene, and purple: naphthalene), shaped according to formation conditions (circle: dry, RO<sub>2</sub> + HO<sub>2</sub>; square: humid, RO<sub>2</sub> + HO<sub>2</sub>; and triangle: dry, RO<sub>2</sub> + NO), and sized by TNF- $\alpha$  and IL-6 levels. SOA precursors are shown as stars, colored by SOA system.

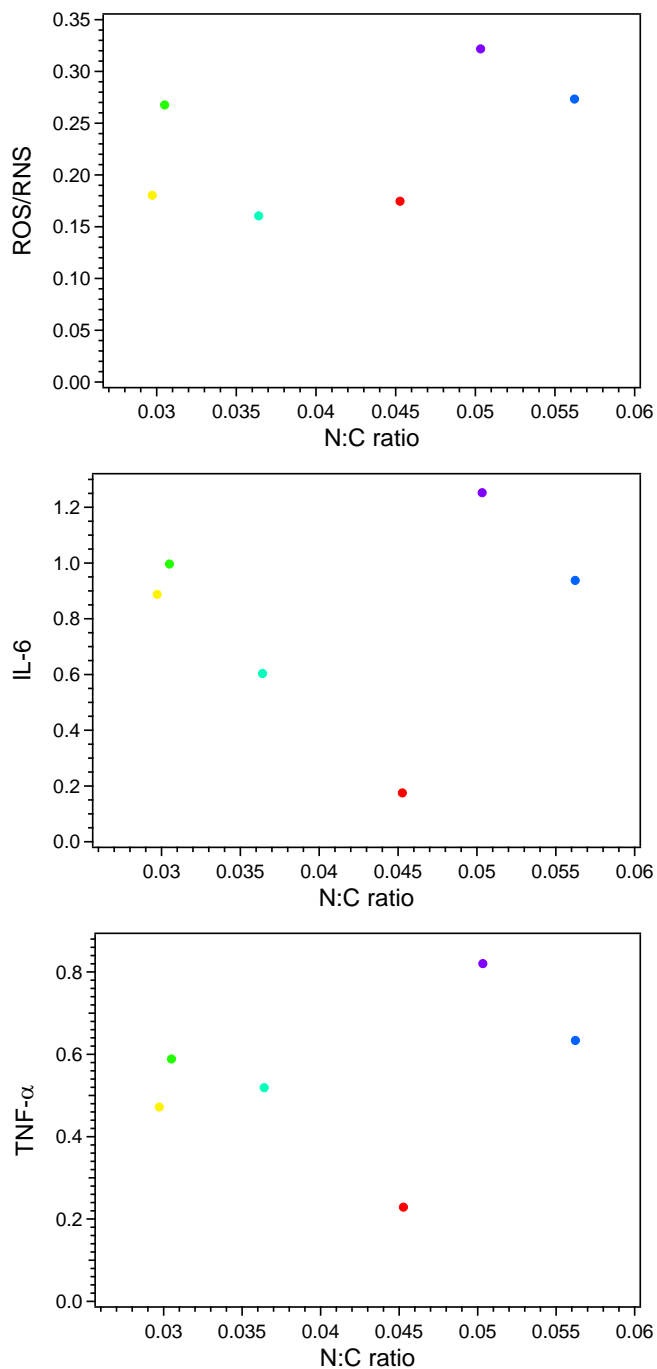

**Figure S4.** ROS/RNS, TNF- $\alpha$ , and IL-6 (represented as AUC per  $\mu\text{g}$ ) for various SOA systems spanning a wide range of N:C ratios. Data points are colored by SOA system (red: isoprene, yellow:  $\alpha$ -pinene, green:  $\beta$ -caryophyllene, light blue: pentadecane, blue: *m*-xylene, and purple: naphthalene).

**Table S1.** SOA precursor structures.

| Compound               | Structure                                                                                                                                                                                                                 |
|------------------------|---------------------------------------------------------------------------------------------------------------------------------------------------------------------------------------------------------------------------|
| Isoprene               | 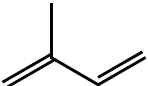 The structure of Isoprene is shown as a skeletal formula of a branched diene, specifically 2-methyl-1,3-butadiene.                     |
| $\alpha$ -pinene       |  The structure of $\alpha$ -pinene is shown as a bicyclic diene, specifically 1,2,3,4,4a,8-hexahydronaphthalene.                        |
| $\beta$ -caryophyllene |  The structure of $\beta$ -caryophyllene is shown as a complex bicyclic diene with a large ring system and several methyl substituents. |
| Pentadecane            |  The structure of Pentadecane is shown as a zigzag line representing a long, straight-chain alkane with 15 carbon atoms.               |
| m-xylene               |  The structure of m-xylene is shown as a benzene ring with two methyl groups attached at the meta position.                           |
| Naphthalene            |  The structure of Naphthalene is shown as two fused benzene rings sharing a common side.                                              |
